# Supplementary material
Source: PubMed Central journal article supplement (PMC3401322)
Supplement: NIHMS380789-supplement-1.pdf [file NIHMS380789-supplement-1.pdf]

## SUPPLEMENTARY MATERIAL

**Supplementary Table I.** Primers used for quantitative real-time PCR.

| <b>Gene</b>    | <b>Forward Primer (5'-3')</b> | <b>Reverse Primer (5'-3')</b> |
|----------------|-------------------------------|-------------------------------|
| <i>Apitd1</i>  | TCTCTGCCAGGAAGTCACG           | GAAAAGTCACCTCGGAGATCG         |
| <i>Ccdc21</i>  | GACAAGCAAAGGAAGCATATCTC       | AGTGTTCTCTCGCTGCAACTC         |
| <i>Ccdc28b</i> | CAATTCATACAGAAGCTACACTTG      | CACAGTTTGAAGAGGAGAGTAGCAG     |
| <i>Ephb2</i>   | CTGTCCTCTGGCATCAACCT          | AAAGCTGGTGTAGTCCGGTATC        |
| <i>Lrp8</i>    | CTCCAGTGAAGAGTGTCTCTGC        | CACAGTCCTTCTCTCCGTCG          |
| <i>Mtor</i>    | ACAGATCCTGACCCTGATATGC        | ATTCAGAGCCACAAACAGAGC         |
| <i>Padi2</i>   | AGCGACAAGGTCACTGTCAATACT      | ATGCCTTCTTAGGATTGTTCTTCTC     |
| <i>Ptprf</i>   | AGCTGTGCCCTTCAAGATCC          | CGCTACTGCCACGATTATC           |
| <i>Tceb3</i>   | GGTTCAGTAGAGCGAAATAGTG        | CCAGAGGGTTTCCAGCTTTC          |
| <i>Zfp69</i>   | CCAGAGGATCCCATTTTAGATGTG      | CCTCGTGATGCCATGATCG           |
| <i>Hprt</i>    | CAATGCAAACCTTGCTTTCC          | AAATCCAACAAAGTCTGGCC          |

**Supplementary Table II.** Microarray probes detecting differentially expressed transcripts between NOD vs. NR4 B cells.

| Probe        | Gene                 | Chr: Position (bases)  | NOD vs NR4 fold-change <sup>a</sup> | q-value (FDR) <sup>b</sup> |
|--------------|----------------------|------------------------|-------------------------------------|----------------------------|
| 1449038_at   | <i>Hsd11b1</i>       | 1:195047829-195068553  | -2.41                               | 8.73E-03                   |
| 1442347_at   | <i>Lrp8</i>          | 4:107547998-107549437  | -2.13                               | 3.68E-02                   |
| 1420044_at   | <i>Osbpl9</i>        | 4:108733579-108734079  | 2.49                                | 2.24E-02                   |
| 1420843_at   | <i>Ptprf</i>         | 4:117880771-117964010  | -1.58                               | 4.08E-02                   |
| 1458274_at   | <i>Zfp69</i>         | 4:120602743-120603230  | 7.92                                | 2.24E-02                   |
| 1454913_at   | <i>9930104L06Rik</i> | 4:124621223-124621905  | -2.60                               | 3.58E-02                   |
| 1459840_s_at | <i>Ccdc28b</i>       | 4:129296518-129296771  | -7.36                               | 1.91E-03                   |
| 1454861_at   | <i>Txlna</i>         | 4:129303323-129305534  | -2.18                               | 1.19E-02                   |
| 1418630_at   | <i>Khdrbs1</i>       | 4:129391062-129419549  | -2.82                               | 2.03E-02                   |
| 1435982_at   | <i>Stx12</i>         | 4:132409417-132410076  | -2.14                               | 4.46E-02                   |
| 1442318_at   | <i>Nudc</i>          | 4:133087684-133088210  | 7.33                                | 2.03E-03                   |
| 1432391_at   | <i>Ccdc21</i>        | 4:133720120-133743000  | -15.16                              | 1.57E-06                   |
| 1434117_at   | <i>Tceb3</i>         | 4:135559282-135560774  | 1.72                                | 2.95E-03                   |
| 1454022_at   | <i>Ephb2</i>         | 4:136325304-136391889  | -2.53                               | 3.93E-02                   |
| 1418252_at   | <i>Padi2</i>         | 4:140462258-140508501  | 3.51                                | 2.03E-03                   |
| 1448390_a_at | <i>Dhrs3</i>         | 4:144482695-144517545  | 9.41                                | 2.24E-02                   |
| 1436574_at   | <i>1700029I01Rik</i> | 4:145420139-146555866  | -2.83                               | 4.27E-03                   |
| 1442183_at   | <i>Gm13238</i>       | 4:145430789-146566430  | -5.47                               | 1.25E-03                   |
| 1451477_at   | <i>Gm13139</i>       | 4:145371445-146555000  | 3.91                                | 2.94E-03                   |
| 1446175_at   | -                    | 4:145425823-146561350  | -9.38                               | 4.41E-03                   |
| 1428604_at   | <i>2610305D13Rik</i> | 4:146986045-147076644  | 38.06                               | 5.08E-06                   |
| 1424213_at   | <i>Ubiad1</i>        | 4:147808603-147818888  | 1.45                                | 4.15E-02                   |
| 1451478_at   | <i>Mtor</i>          | 4:147869291-147874571  | 2.41                                | 1.26E-02                   |
| 1453067_at   | <i>Apitd1</i>        | 4:148502307-148511728  | 4.22                                | 6.18E-03                   |
| 1423994_at   | <i>Kif1b</i>         | 4:148550427-148681740  | 2.27                                | 4.79E-02                   |
| 1424588_at   | <i>Srgap3</i>        | 6:112667964-112670977  | -13.16                              | 1.55E-04                   |
| 1445537_at   | <i>2310039F13Rik</i> | 6:112708194-112708767  | -20.41                              | 5.48E-04                   |
| 1460442_at   | <i>Rps19</i>         | 7:25669654-25674825    | 3.83                                | 1.55E-04                   |
| 1435703_at   | <i>Ubash3b</i>       | 9:40819175-40820310    | -1.54                               | 3.58E-02                   |
| 1448862_at   | <i>Icam2</i>         | 11:106238969-106244292 | 14.94                               | 1.02E-02                   |
| 1417826_at   | <i>Akr1e1</i>        | 13:4591735-4608407     | -3.99                               | 2.24E-02                   |
| 1435088_at   | <i>Nsd1</i>          | 13:55417742-55419687   | -3.69                               | 1.25E-03                   |
| 1452452_at   | -                    | Unmapped               | -5.97                               | 1.66E-03                   |
| 1452426_x_at | -                    | Unmapped               | -29.55                              | 6.98E-06                   |

<sup>a</sup> Mean fold-change (FC) in expression between five NOD and six NR4 B cell samples (combination of BCR-stimulated and unstimulated samples). Positive fold changes shown for probes where NOD>NR4, while negative fold changes denote probes where NR4>NOD.

<sup>b</sup> A FDR cutoff of  $q < 0.05$  was used to define differentially expressed transcripts between NOD and NR4 samples.

**Supplementary Table III.** Microarray probes detecting differentially expressed transcripts in BCR-stimulated vs. unstimulated B cells from NOD or NR4 strains only, or in both strains.

| Probe        | Gene                 | Chr: Position (b)      | NOD FC<br>(s vs. us) <sup>a</sup> | q-value <sup>c</sup> | NR4 FC<br>(s vs. us) <sup>b</sup> | q-value <sup>c</sup> |
|--------------|----------------------|------------------------|-----------------------------------|----------------------|-----------------------------------|----------------------|
| 1444878_at   | -                    | 1:80662178-80663151    | 2.52                              | 8.89E-02             |                                   |                      |
| 1452666_a_at | <i>Tmcc2</i>         | 1:134252891-134287857  | -2.01                             | 5.24E-02             |                                   |                      |
| 1449363_at   | <i>Atf3</i>          | 1:192994177-193007212  | 2.51                              | 2.90E-02             |                                   |                      |
| 1449270_at   | <i>Plxdc2</i>        | 2:16277917-16673950    | 2.24                              | 7.08E-02             |                                   |                      |
| 1450749_a_at | <i>Nr4a2</i>         | 2:56959927-56967666    | 2.08                              | 5.09E-02             |                                   |                      |
| 1450750_a_at | <i>Nr4a2</i>         | 2:56959927-56967666    | 2.49                              | 8.08E-02             |                                   |                      |
| 1447863_s_at | <i>Nr4a2</i>         | 2:56960532-56960760    | 2.47                              | 5.76E-02             |                                   |                      |
| 1432678_at   | <i>Itgav</i>         | 2:83607291-83609658    | 2.44                              | 7.20E-02             |                                   |                      |
| 1415874_at   | <i>Spry1</i>         | 3:37538858-37543520    | 2.82                              | 5.24E-02             |                                   |                      |
| 1416022_at   | <i>Fabp5</i>         | 3:57331738-10016612    | 2.06                              | 4.11E-02             |                                   |                      |
| 1436836_x_at | <i>Cnn3</i>          | 3:121160605-121161125  | -2.16                             | 3.34E-02             |                                   |                      |
| 1455570_x_at | <i>Cnn3</i>          | 3:121160772-121161113  | -2.21                             | 4.11E-02             |                                   |                      |
| 1417539_at   | <i>Slc35a1</i>       | 4:34610505-34634676    | -2.07                             | 5.24E-02             |                                   |                      |
| 1429262_at   | <i>Rassf6</i>        | 5:91032109-91060635    | 2.16                              | 6.07E-02             |                                   |                      |
| 1446055_at   | -                    | 5:124915788-124916508  | 2.11                              | 2.02E-02             |                                   |                      |
| 1454551_at   | <i>9530034D02Rik</i> | 6:31280626-31281731    | 2.40                              | 2.02E-02             |                                   |                      |
| 1437671_x_at | <i>Prss23</i>        | 7:96657609-96657905    | 3.35                              | 5.95E-02             |                                   |                      |
| 1431057_a_at | <i>Prss23</i>        | 7:96657618-96666049    | 2.19                              | 4.51E-02             |                                   |                      |
| 1453547_at   | <i>1810046K07Rik</i> | 9:51097798-51137022    | 2.85                              | 7.97E-02             |                                   |                      |
| 1444402_at   | <i>Zc3h12c</i>       | 9:51920089-51920815    | 2.30                              | 2.70E-02             |                                   |                      |
| 1457824_at   | <i>Plscr1</i>        | 9:92147080-92147413    | 2.48                              | 2.22E-02             |                                   |                      |
| 1440432_at   | -                    | 9:123621990-123622647  | 2.73                              | 7.08E-02             |                                   |                      |
| 1438588_at   | <i>Plagl1</i>        | 10:12835007-12835966   | 2.09                              | 5.24E-02             |                                   |                      |
| 1430581_at   | <i>Bclaf1</i>        | 10:20048836-20053697   | 2.49                              | 4.92E-02             |                                   |                      |
| 1437992_x_at | <i>Gjal</i>          | 10:56110005-56110221   | -2.59                             | 2.22E-02             |                                   |                      |
| 1422708_at   | <i>Pik3cg</i>        | 12:32857997-32893335   | -2.01                             | 2.02E-02             |                                   |                      |
| 1428851_at   | <i>1300014I06Rik</i> | 13:34719704-34758192   | -2.31                             | 4.11E-02             |                                   |                      |
| 1421477_at   | <i>Cplx2</i>         | 13:54479945-54481604   | -2.09                             | 4.11E-02             |                                   |                      |
| 1436387_at   | <i>Homer1</i>        | 13:94129653-94131011   | 2.02                              | 4.08E-02             |                                   |                      |
| 1440573_at   | <i>Erbp2ip</i>       | 13:104688064-104688764 | 2.67                              | 7.11E-02             |                                   |                      |
| 1426156_at   | <i>Lats2</i>         | 14:58341026-58353137   | 2.31                              | 3.67E-02             |                                   |                      |
| 1443086_at   | <i>Alcam</i>         | 16:52261222-52261845   | -2.20                             | 2.64E-02             |                                   |                      |
| 1440298_at   | <i>Trem12</i>        | 17:48451176-48451863   | -2.05                             | 3.34E-02             |                                   |                      |
| 1444299_at   | <i>A430093F15Rik</i> | 19:10830372-10860533   | 2.07                              | 8.73E-02             |                                   |                      |
| 1418248_at   | <i>Gla</i>           | X:131122894-131135505  | 2.13                              | 4.95E-02             |                                   |                      |
| 1450330_at   | <i>Il10</i>          | 1:132916423-132921547  |                                   |                      | 3.19                              | 2.82E-02             |
| 1428789_at   | <i>Ralgps2</i>       | 1:158734296-158735895  |                                   |                      | -2.43                             | 4.60E-02             |
| 1431704_a_at | <i>Ralgps2</i>       | 1:158743211-158869698  |                                   |                      | -2.12                             | 4.16E-03             |
| 1457773_at   | <i>Slamf6</i>        | 1:173882570-173883300  |                                   |                      | -2.74                             | 2.90E-02             |
| 1454877_at   | <i>Sertad4</i>       | 1:194670624-194677337  |                                   |                      | -3.12                             | 3.97E-02             |
| 1426875_s_at | <i>Srxn1</i>         | 2:151935895-151937106  |                                   |                      | 2.06                              | 7.28E-02             |
| 1419942_at   | <i>Npn3</i>          | 2:151936327-151936928  |                                   |                      | 2.42                              | 4.21E-02             |
| 1436480_at   | <i>Dpp7</i>          | 2:25207809-25208394    |                                   |                      | 2.12                              | 4.21E-02             |
| 1416021_a_at | <i>Gm3601</i>        | 3:10012604-10016612    |                                   |                      | 2.24                              | 4.69E-02             |
| 1425454_a_at | <i>Il12a</i>         | 3:68495448-68502013    |                                   |                      | -2.56                             | 2.90E-02             |
| 1449176_a_at | <i>Dck</i>           | 5:89194268-89212270    |                                   |                      | -2.06                             | 2.02E-02             |
| 1448364_at   | <i>Ccng2</i>         | 5:93696282-93705253    |                                   |                      | -2.19                             | 3.68E-02             |
| 1458100_at   | -                    | 6:122538959-122539639  |                                   |                      | -2.10                             | 4.67E-02             |
| 1419769_at   | <i>Cd22</i>          | 7:31650847-31665288    |                                   |                      | -2.51                             | 7.86E-02             |
| 1419768_at   | <i>Cd22</i>          | 7:31650847-31665288    |                                   |                      | -2.18                             | 8.19E-02             |
| 1443969_at   | <i>Irs2</i>          | 8:10986976-11004939    |                                   |                      | 2.04                              | 2.90E-02             |

|              |                      |                        |       |          |       |          |
|--------------|----------------------|------------------------|-------|----------|-------|----------|
| 1434955_at   | <i>March1</i>        | 8:68993022-68994332    |       |          | -2.48 | 4.21E-02 |
| 1422027_a_at | <i>Ets1</i>          | 9:32503610-32562627    |       |          | -2.02 | 2.90E-02 |
| 1440157_at   | <i>Scml4</i>         | 10:42582798-42583132   |       |          | -2.56 | 1.94E-02 |
| 1429413_at   | <i>Cpm</i>           | 10:117066775-117122359 |       |          | -4.08 | 7.04E-02 |
| 1457339_at   | <i>Ccm2</i>          | 11:6446890-6496747     |       |          | -2.02 | 1.94E-02 |
| 1418421_at   | <i>Bcl6b</i>         | 11:70037628-70042674   |       |          | 2.70  | 1.94E-02 |
| 1423339_s_at | <i>Ccdc16</i>        | 11:82577846-82579757   |       |          | -2.11 | 3.68E-02 |
| 1444376_at   | <i>Sesn1</i>         | 10:41622229-41623046   |       |          | -2.04 | 2.82E-02 |
| 1441482_at   | -                    | 11:110261063-110261748 |       |          | -3.79 | 3.68E-02 |
| 1420342_at   | <i>Gdap10</i>        | 12:33506736-33511770   |       |          | 2.20  | 2.02E-02 |
| 1450350_a_at | <i>Jdp2</i>          | 12:86940967-86980827   |       |          | 2.10  | 2.90E-02 |
| 1437221_at   | <i>Rrm2b</i>         | 13:3352742-3353251     |       |          | -2.00 | 9.01E-03 |
| 1437222_x_at | <i>Rrm2b</i>         | 13:3352742-3353251     |       |          | -2.26 | 4.16E-03 |
| 1458206_at   | <i>LOC218805</i>     | 14:21185185-21185948   |       |          | -2.00 | 4.16E-03 |
| 1448860_at   | <i>Rem2</i>          | 14:55094936-55099273   |       |          | 2.51  | 2.90E-02 |
| 1417750_a_at | <i>Slc25a37</i>      | 14:69859904-69903160   |       |          | -2.04 | 4.31E-02 |
| 1442445_at   | <i>2610027H17Rik</i> | 14:79123667-79124134   |       |          | 2.71  | 2.90E-02 |
| 1453287_at   | <i>Ankrd33b</i>      | 15:31253710-31297323   |       |          | 2.04  | 2.90E-02 |
| 1438030_at   | <i>Rasgrp3</i>       | 17:75926335-75928391   |       |          | -2.25 | 2.63E-02 |
| 1430143_at   | <i>4930426D05Rik</i> | 18:21810065-21814608   |       |          | -2.59 | 2.90E-02 |
| 1421912_at   | <i>Slc23a1</i>       | 18:35773951-35786881   |       |          | -2.24 | 2.90E-02 |
| 1450188_s_at | <i>Lipg</i>          | 18:75099035-75120914   |       |          | 2.70  | 2.90E-02 |
| 1428114_at   | <i>Slc14a1</i>       | 18:78296832-78298443   |       |          | -4.47 | 2.90E-02 |
| 1418353_at   | <i>Cd5</i>           | 19:10792632-10813464   |       |          | -2.09 | 6.13E-02 |
| 1431106_a_at | <i>9530053H05Rik</i> | X:4789659-4791091      |       |          | -2.12 | 1.94E-02 |
| 1442263_at   | <i>Rgs13</i>         | 1:145985796-145986427  | 2.32  | 3.68E-02 | 2.27  | 5.80E-02 |
| 1417601_at   | <i>Rgs1</i>          | 1:146091799-146096198  | 3.31  | 2.02E-02 | 2.79  | 1.94E-02 |
| 1442116_at   | <i>Gm1012</i>        | 2:118102844-118103494  | 3.36  | 5.76E-02 | 5.80  | 4.21E-02 |
| 1453590_at   | <i>Arl8</i>          | 2:14976908-14998230    | 2.78  | 3.34E-02 | 3.42  | 2.08E-02 |
| 1451680_at   | <i>Srxn1</i>         | 2:151931260-151936197  | 2.58  | 7.97E-02 | 2.16  | 5.16E-02 |
| 1417679_at   | <i>Gfi1</i>          | 5:108145672-108153363  | 2.25  | 2.02E-02 | 2.21  | 2.63E-02 |
| 1428207_at   | <i>Bcl7a</i>         | 5:123794462-123824091  | -2.55 | 2.02E-02 | -3.20 | 1.90E-02 |
| 1422134_at   | <i>Fosb</i>          | 7:19888045-19895100    | 2.55  | 5.76E-02 | 2.17  | 5.80E-02 |
| 1428834_at   | <i>Dusp4</i>         | 8:35882847-35885006    | 2.98  | 8.31E-02 | 3.10  | 1.14E-02 |
| 1453220_at   | <i>Fam55b</i>        | 9:48126088-48148943    | -4.66 | 4.22E-02 | -5.64 | 5.80E-03 |
| 1453360_a_at | <i>Tex9</i>          | 9:72308907-72339763    | -2.14 | 8.73E-02 | -2.02 | 5.86E-02 |
| 1429963_at   | <i>Mapk6</i>         | 9:75256133-75257797    | 2.06  | 2.02E-02 | 2.04  | 3.08E-02 |
| 1419004_s_at | <i>Bcl2a1</i>        | 9:88618122-114239689   | 2.14  | 2.85E-02 | 2.23  | 4.80E-02 |
| 1427683_at   | <i>Egr2</i>          | 10:67000625-67004935   | 2.57  | 2.02E-02 | 2.39  | 7.15E-03 |
| 1427682_a_at | <i>Egr2</i>          | 10:67000625-67004935   | 2.09  | 4.95E-02 | 2.22  | 4.16E-03 |
| 1453009_at   | <i>Cpm</i>           | 10:117122298-117124401 | -4.17 | 9.25E-02 | -7.05 | 5.36E-02 |
| 1420710_at   | <i>Rel</i>           | 11:23641516-23670970   | 2.2   | 3.34E-02 | 2.07  | 2.63E-02 |
| 1421578_at   | <i>Ccl4</i>          | 11:83476088-83478182   | 3.51  | 4.95E-02 | 3.15  | 4.16E-03 |
| 1419561_at   | <i>Ccl3</i>          | 11:83461344-83462880   | 4.11  | 4.95E-02 | 2.66  | 7.42E-02 |
| 1422631_at   | <i>Ahr</i>           | 12:36182645-36219576   | 2.01  | 2.70E-02 | 2.05  | 1.94E-02 |
| 1450695_at   | <i>Ahr</i>           | 12:36182645-36219576   | 2.18  | 4.95E-02 | 2.19  | 7.20E-02 |
| 1440162_x_at | <i>A630043P06</i>    | 13:12569175-12612715   | -3.11 | 9.04E-02 | -3.08 | 3.44E-02 |
| 1437800_at   | <i>Edaradd</i>       | 13:12569079-12569626   | -4.52 | 4.95E-02 | -6.63 | 3.71E-02 |
| 1421174_at   | <i>Irf4</i>          | 13:30841126-30858850   | 2.64  | 3.34E-02 | 2.26  | 6.75E-03 |
| 1438658_a_at | <i>Slp3</i>          | 13:51517303-51517499   | 2.3   | 4.95E-02 | 2.24  | 1.03E-02 |
| 1438511_a_at | <i>1190002H23Rik</i> | 14:79688553-79688817   | 2.66  | 4.95E-02 | 3.77  | 9.11E-02 |
| 1424942_a_at | <i>Myc</i>           | 15:61818976-61821802   | 3.09  | 4.46E-02 | 2.46  | 4.60E-02 |
| 1418936_at   | <i>Maff</i>          | 15:79178119-79189504   | 3.59  | 4.95E-02 | 3.87  | 2.90E-02 |
| 1431394_a_at | <i>Lrrk2</i>         | 15:91610808-91646111   | -2.43 | 3.34E-02 | -4.43 | 1.14E-02 |
| 1416505_at   | <i>Nr4a1</i>         | 15:101097281-101105230 | 2.72  | 4.95E-02 | 2.67  | 5.55E-02 |

|              |                  |                       |       |          |       |          |
|--------------|------------------|-----------------------|-------|----------|-------|----------|
| 1443553_at   | -                | 17:52002007-52002542  | -2.27 | 8.73E-02 | -2.37 | 8.19E-02 |
| 1452408_at   | <i>LOC547214</i> | 17:7515626-13535099   | 2.47  | 7.08E-02 | 2.31  | 4.60E-02 |
| 1428837_at   | <i>Klhl14</i>    | 18:21708879-21810583  | -2.83 | 2.02E-02 | -4.53 | 2.98E-02 |
| 1421262_at   | <i>Lipg</i>      | 18:75099035-75120914  | 2.1   | 8.31E-02 | 3.56  | 2.90E-02 |
| 1447084_at   | <i>Nfatc1</i>    | 18:80844173-80844704  | 2.16  | 4.95E-02 | 2.09  | 4.08E-02 |
| 1425761_a_at | <i>Nfatc1</i>    | 18:80845197-80909810  | 2.17  | 4.11E-02 | 2.01  | 2.82E-02 |
| 1441887_x_at | <i>Sh3bgrl</i>   | X:106395423-106395710 | 2.82  | 2.02E-02 | 3.17  | 3.04E-02 |
| 1448595_a_at | <i>Bex1</i>      | X:132748510-132749998 | 7.48  | 8.89E-02 | 3.17  | 9.91E-02 |

<sup>a</sup> Mean fold-change (FC) in expression between two BCR-stimulated (s) and three unstimulated (us) NOD B cell samples. Positive fold-changes are shown for probes where transcripts were greater in stimulated vs. non-stimulated B cells; while negative fold-changes denote the reverse.

<sup>b</sup> Mean fold-change in expression between three BCR-stimulated and three unstimulated NR4 B cell samples.

<sup>c</sup> A fold change  $\geq 2$  and FDR cutoff of  $q < 0.1$  was used to identify differentially expressed transcripts between BCR stimulated and unstimulated groups for each strain. Grey areas denote no significant changes ( $q > 0.1$ ) of gene expression in NOD or NR4 B cell groups.

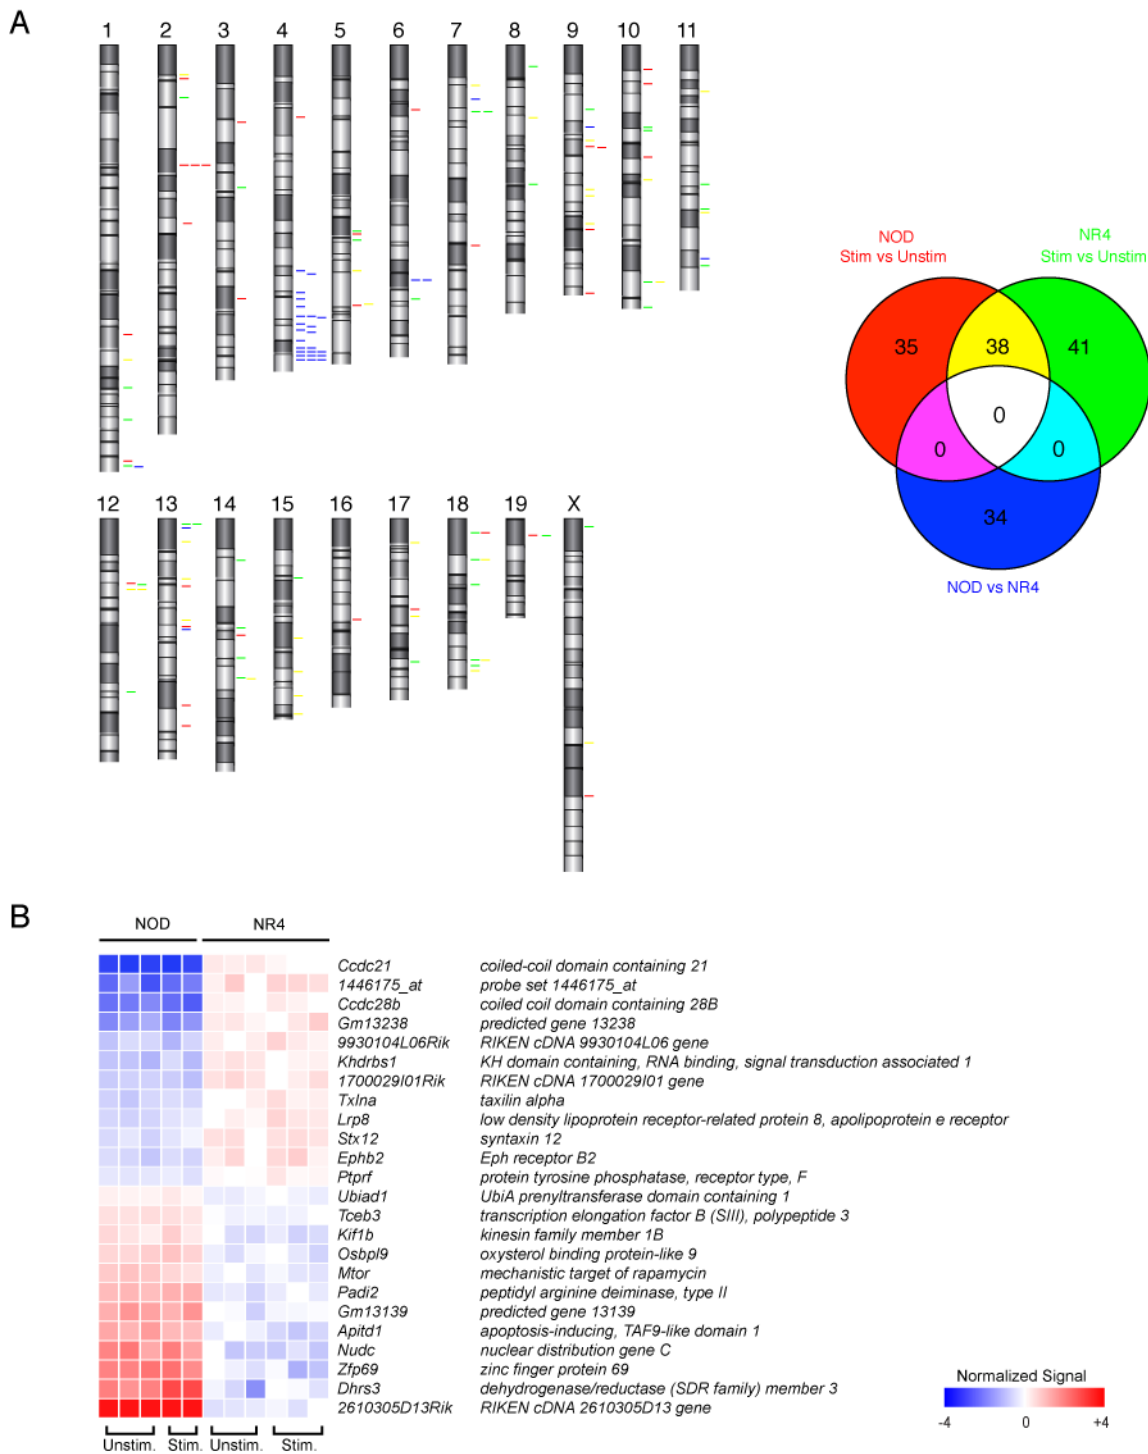

**SUPPLEMENTARY FIGURE 1.** Genes from distal Chr. 4 conditions the genome such that B cells from NOD and NR4 mice exhibit a different genetic response to stimulation. (A) The Venn diagram on the right shows the number of probes that detected differentially expressed transcripts by one-way ANOVA (FDR,  $q < 0.05$ ) between NOD ( $n=5$ ) vs. NR4 ( $n=6$ ) B cell samples (dark blue); or  $\geq 2$ -fold (FDR,  $q < 0.1$ ) between BCR-stimulated (stim.) vs. unstimulated (unstim.) NOD (red;  $n=2$  and  $3$ , respectively) or NR4 (green;  $n=3$  and  $3$ , respectively) B cell samples. Probes deemed significant in multiple tests are shown in overlapping segments. Lists of significant probes for each category are shown in Tables II-V. No probes exhibited significance via two-way ANOVA (FDR,  $q < 0.1$ ) comparing the interaction between strain and stimulation. The approximate chromosomal locations of differentially expressed probes, colored according to Venn diagram, are illustrated in the schematic diagram on the left. (B) Heat-map depicting the normalized signal of individual NOD and NR4 samples for differentially expressed genes on Chr. 4.
